# Supplementary material for: Effect of mass distribution and collection angle in pulsed laser deposited films – a sampling method for chemical characterization of spent nuclear fuel
Source: Royal Society of Chemistry journal article supplement (doi:10.1039/d0ja00316f), 2020-01-01
Supplement: d0ja00316f1.pdf [file d0ja00316f1.pdf]

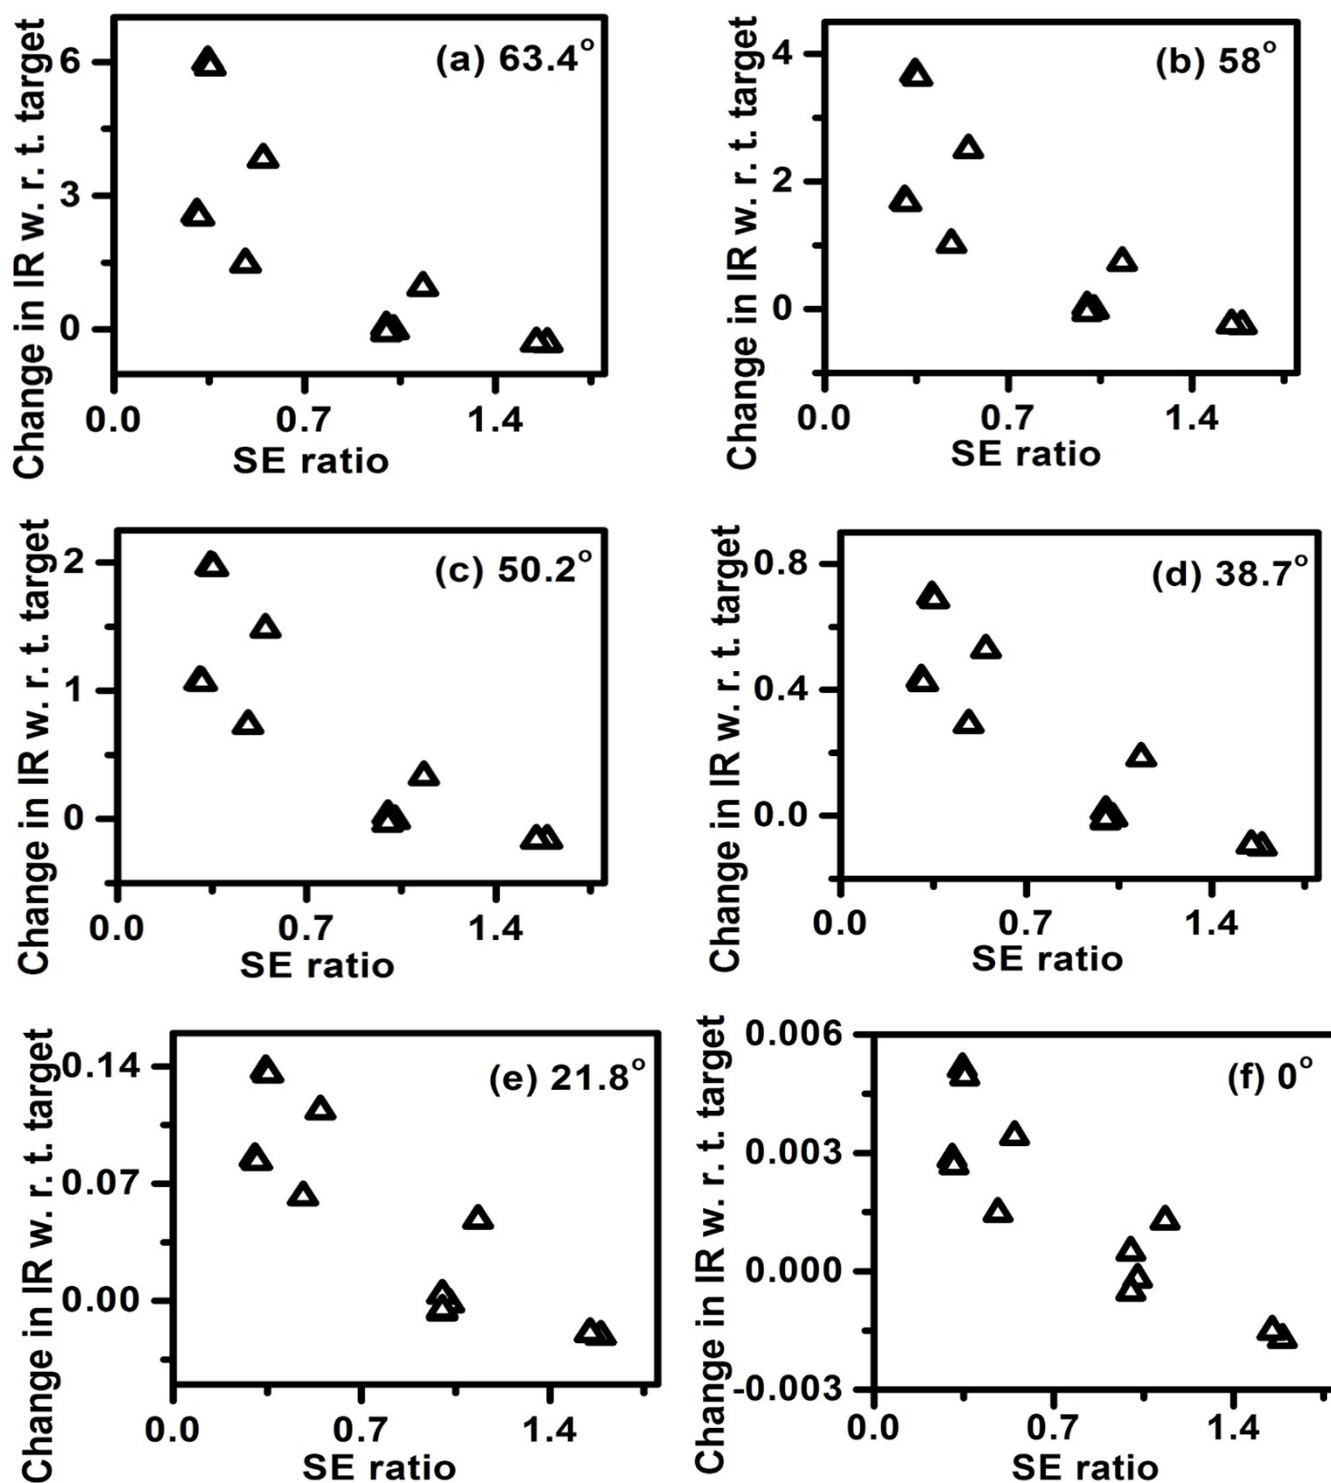

Fig. 7. Relative change in intensity ratio of elements in the PLD films with respect to target composition against corresponding ratio of sublimation energy (SE) at an angle of: (a) 63.4°; (b) 58°; (c) 50.2°; (d) 37.8°; (e) 21.8°; (f) 0°.

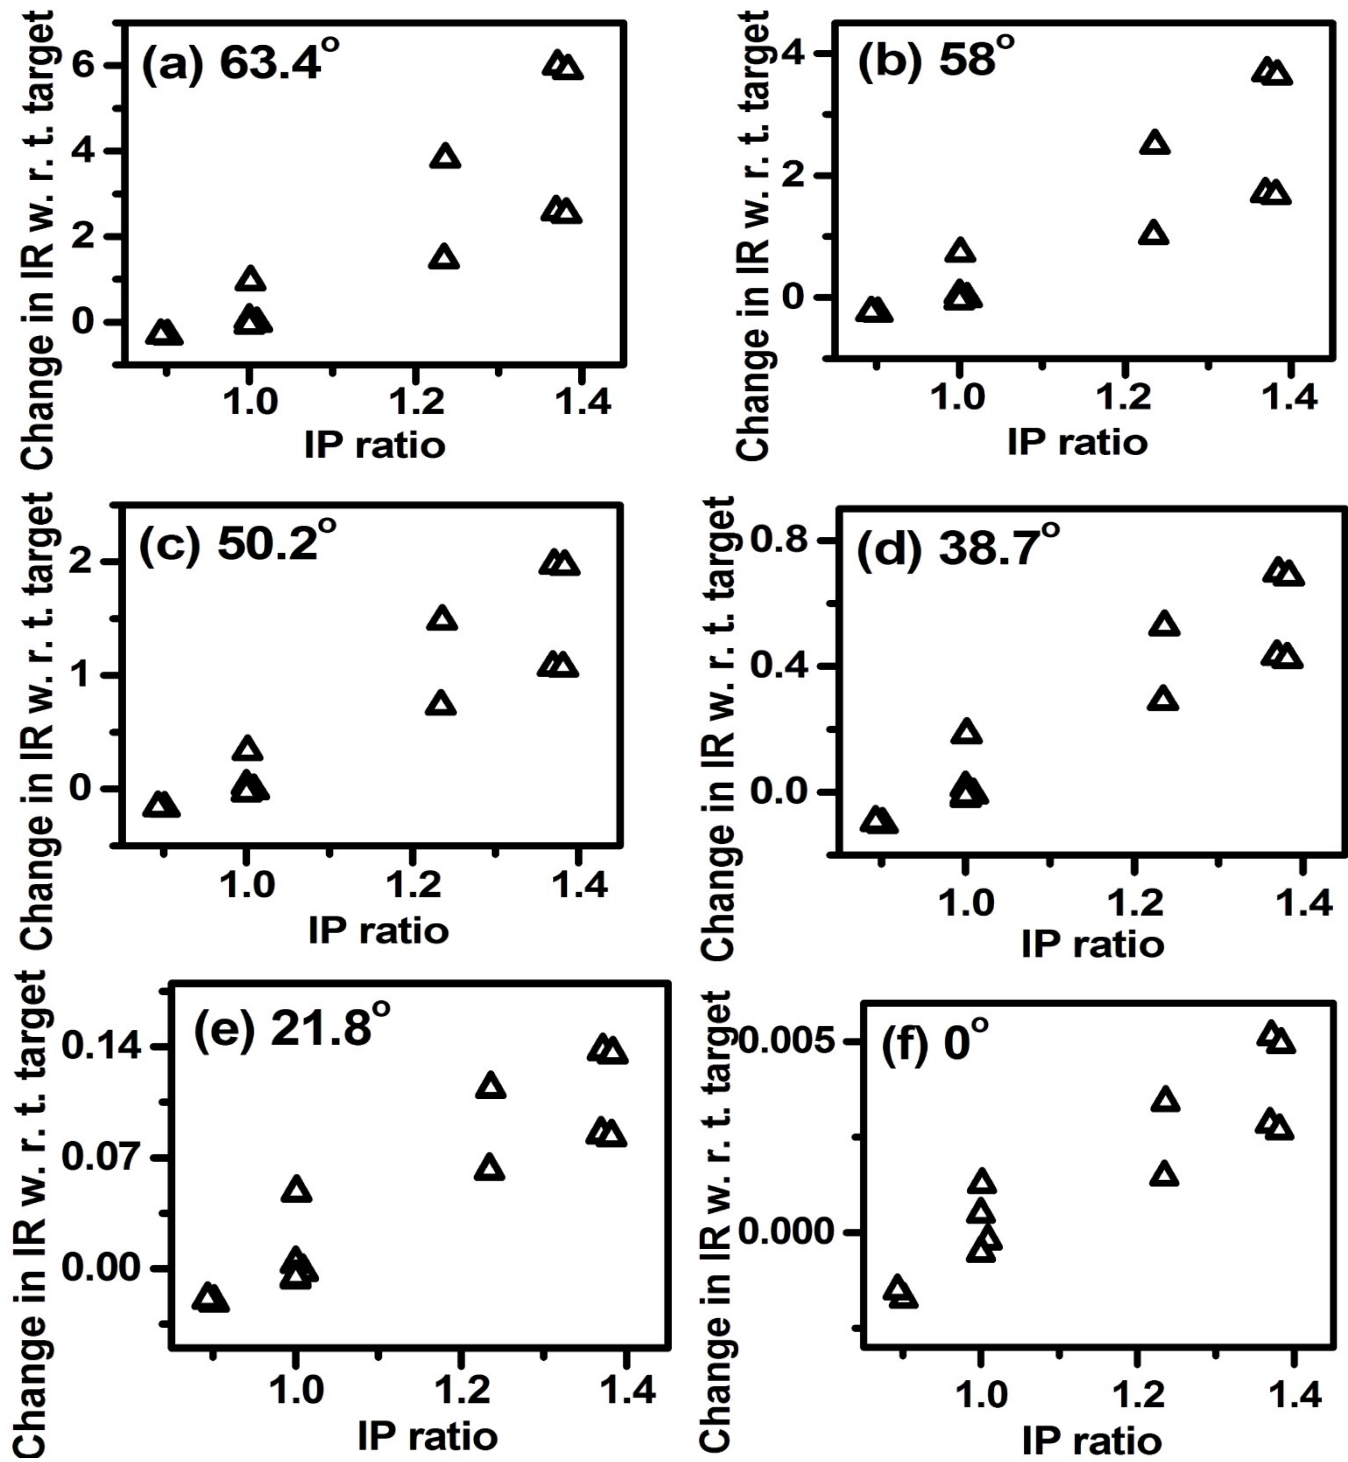

Fig. 8. Relative change in intensity ratio of elements or isotopes in the PLD films with respect to target composition against corresponding ionization potential (IP) ratio at an angle of: (a) 63.4°; (b) 58°; (c) 50.2°; (d) 37.8°; (e) 21.8°; (f) 0°.

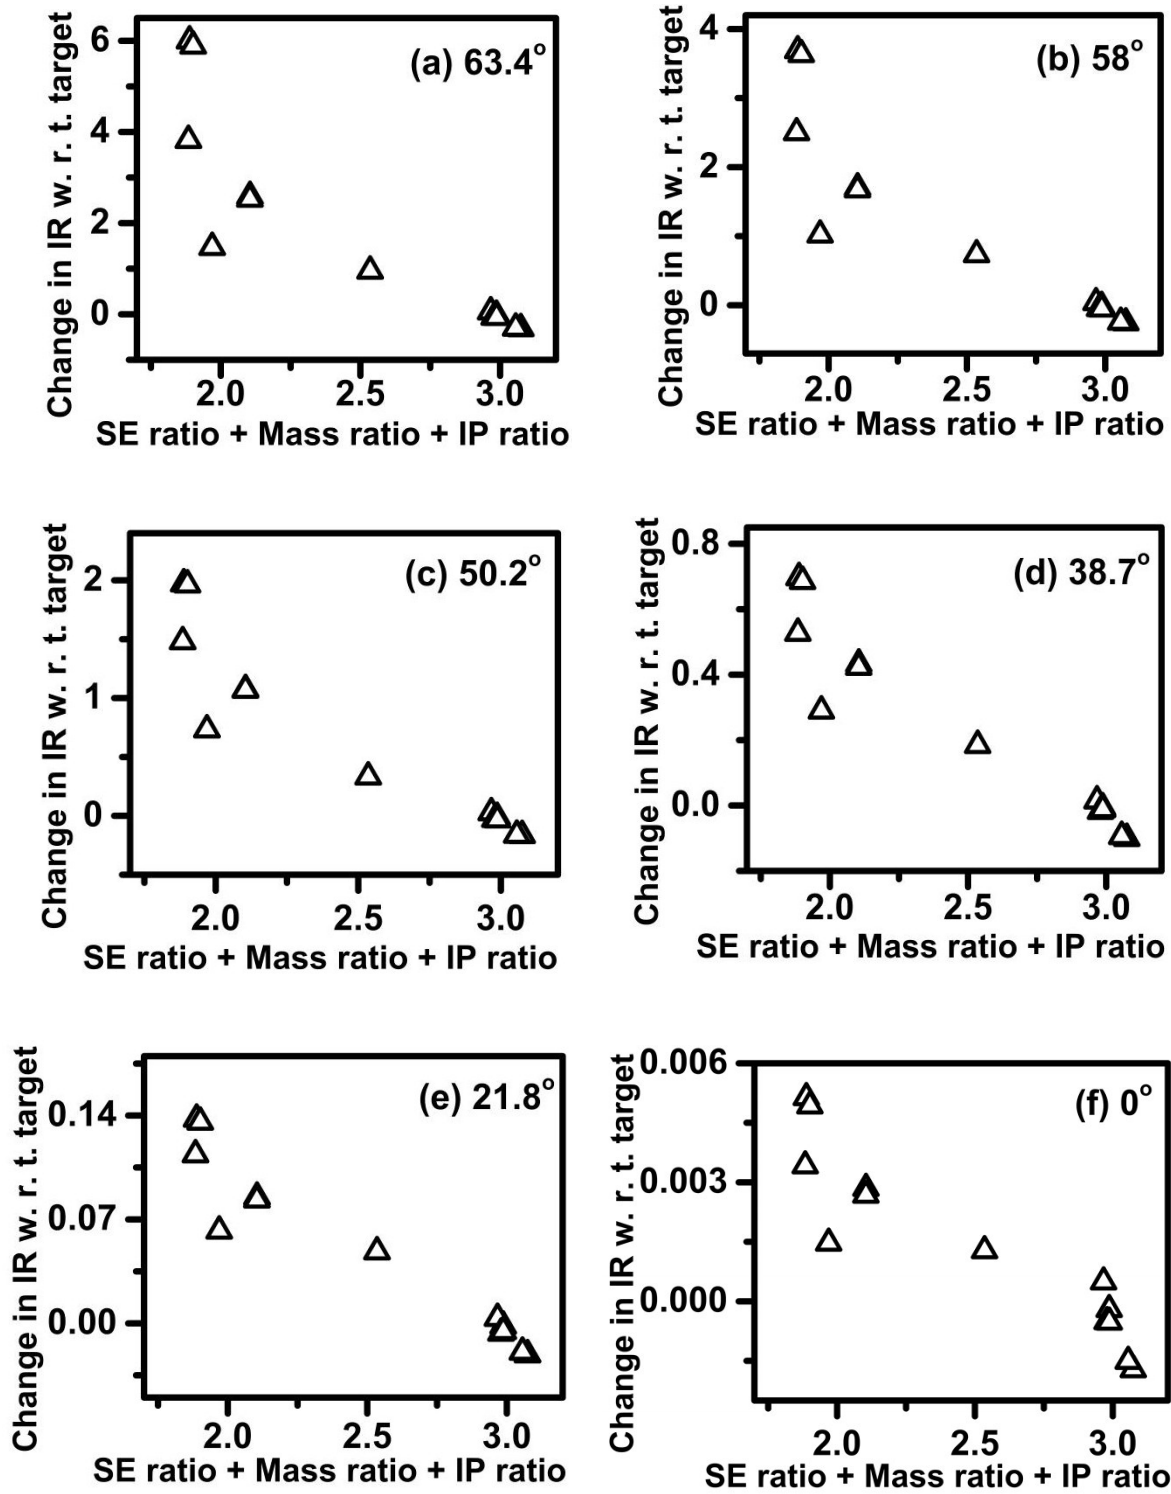

Fig. 9. Relative change in intensity ratio of elements or isotopes in the PLD films with respect to target composition against corresponding value of (SE ratio + mass ratio + IP ratio) at an angle of: (a) 63.4°; (b) 58°; (c) 50.2°; (d) 37.8°; (e) 21.8°; (f) 0°.

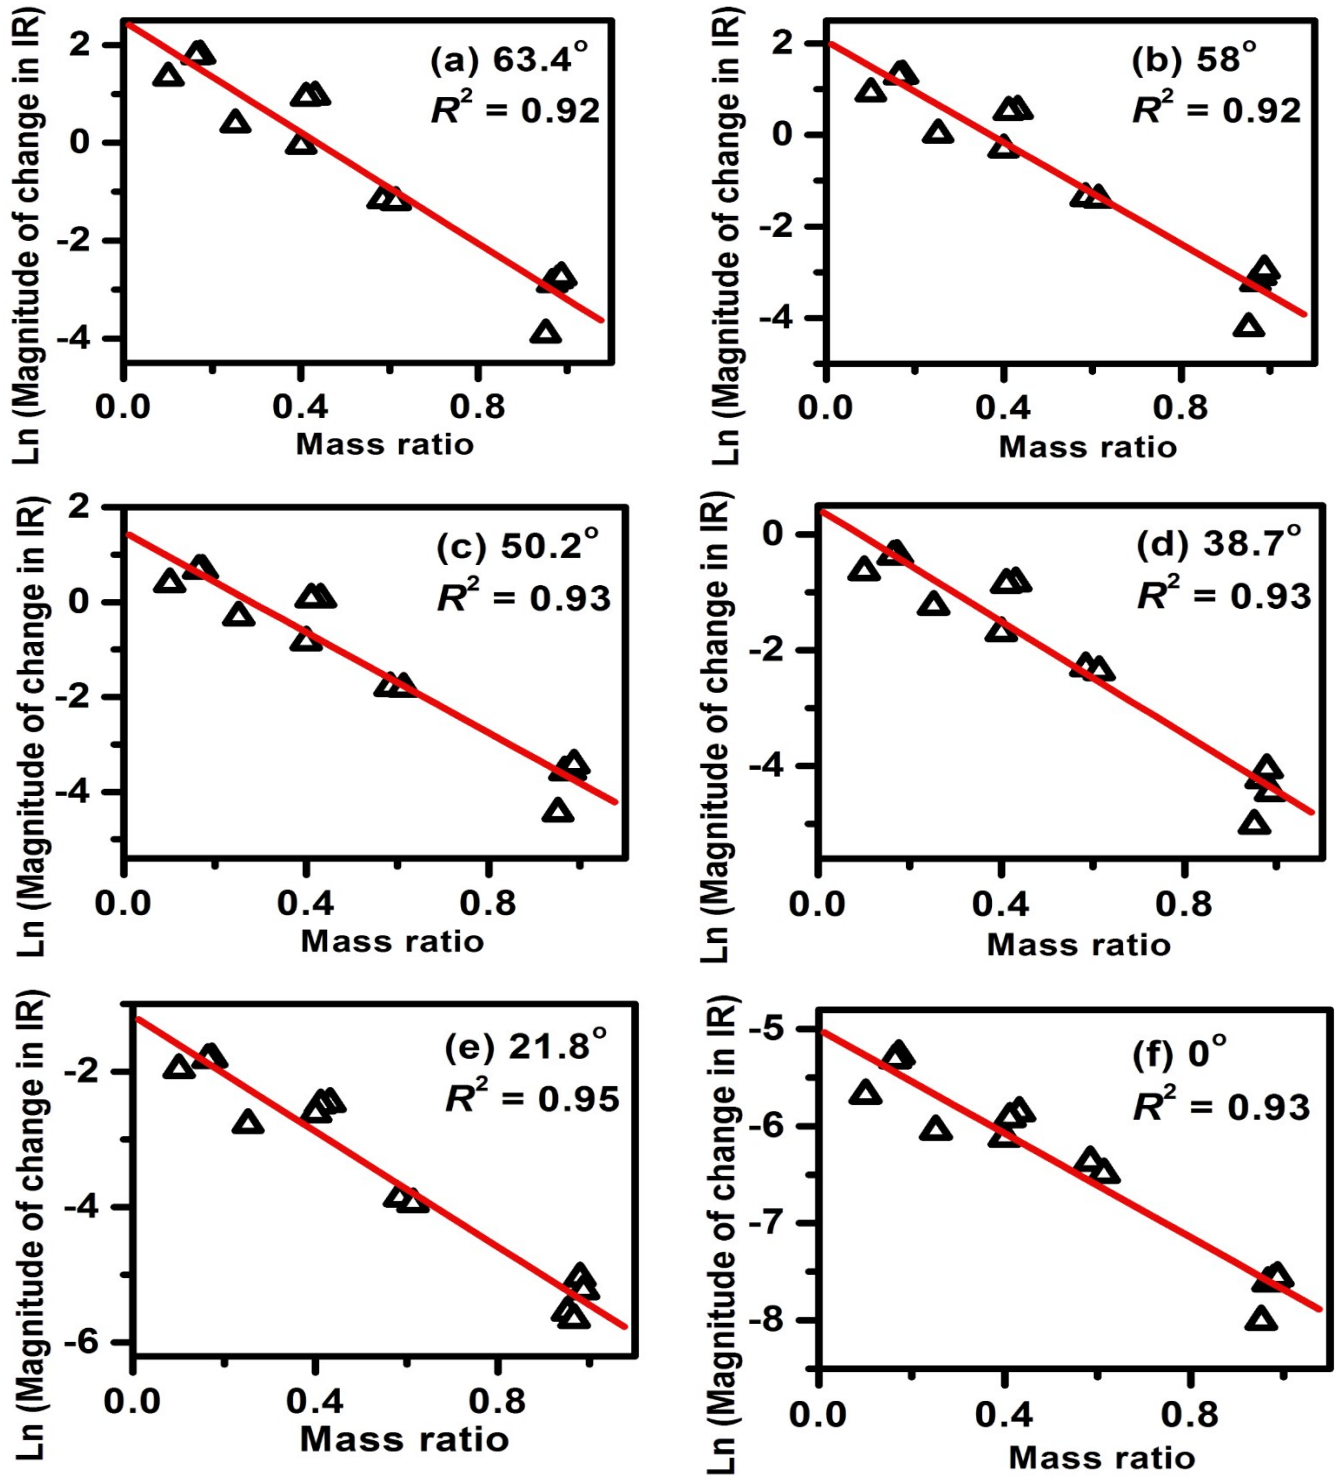

Fig. 10. Relative change in intensity ratio (magnitude) of elements or isotopes in the PLD films with respect to target composition against corresponding mass ratio at an angle of: (a)  $63.4^\circ$ ; (b)  $58^\circ$ ; (c)  $50.2^\circ$ ; (d)  $37.8^\circ$ ; (e)  $21.8^\circ$ ; (f)  $0^\circ$ .

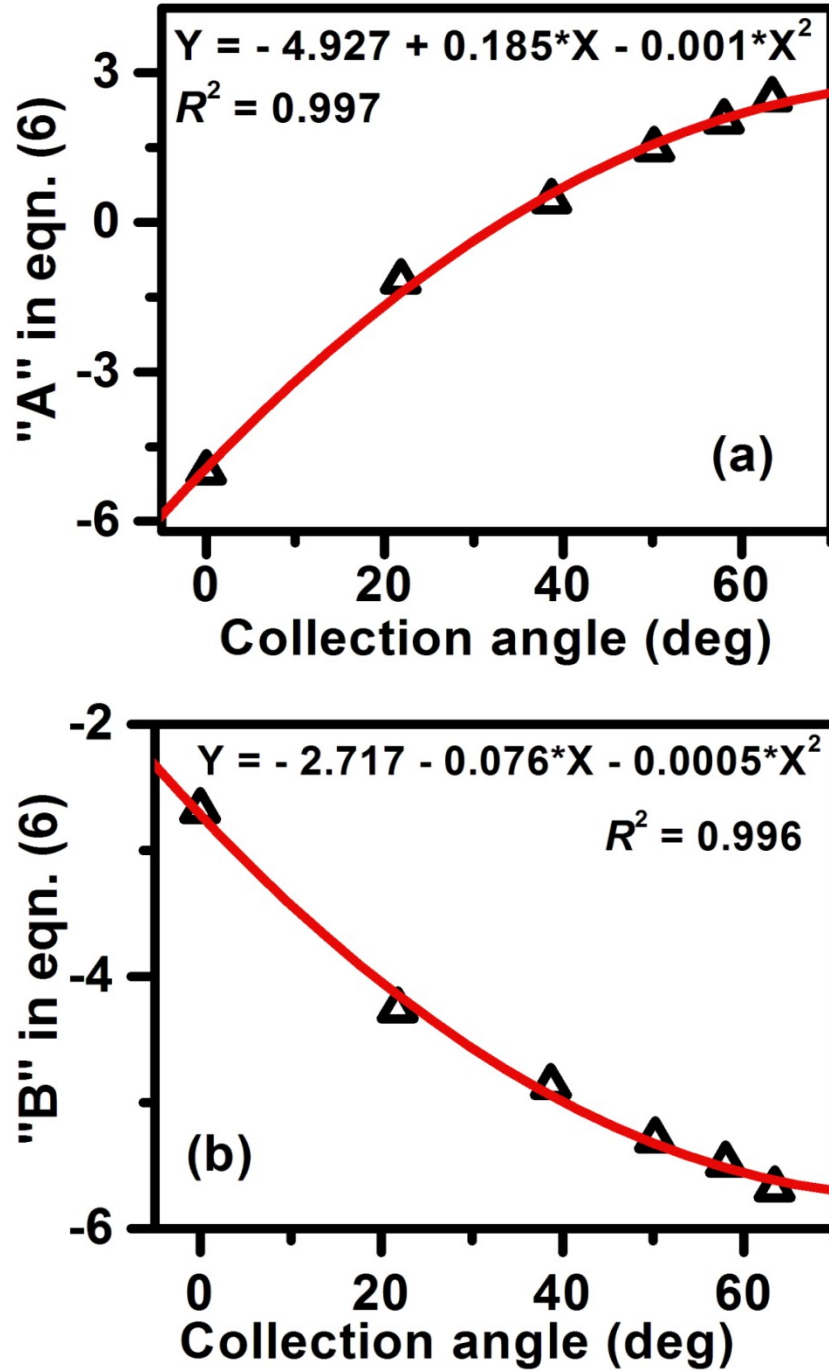

Fig.11. Relation between arbitrary constants in eqn. 6 (i.e. A & B) and angle of deposition.
